# Supplementary material
Source: PubMed Central journal article supplement (PMC2438380)
Supplement: 0802659105_Supplemental_PDF.pdf [file 0802659105_Supplemental_PDF.pdf]

# Supporting Information

Heinen *et al.* 10.1073/pnas.0802659105

## SI Materials and Methods

**Generation of Suppression and Expression Vectors.** Oligonucleotides used for the generation of the pSUPER constructs were as follows: kip1<sub>sense</sub>, GAT CCC CGG TGC CGG CGC AGG AGA GCT TCA AGA GAG CTC TCC TGC GCC GGC ACC TTT TTG GAA A; kip1<sub>antisense</sub>, AGC TTT TCC AAA AAG GTG CCG GCG CAG GAG AGC TCT CTT GAA GCT CTC CTG CGC CGG CAC CGG G; kip2<sub>L.sense</sub>, GAT CCC CCA GGT CCC TGA GCA GGT CTT TCA AGA GAA GAC CTG CTC GGG ACC TGT TTT TGG AAA; kip2<sub>L.antisense</sub>, AGC TTT TCC AAA AAC AGG TCC CTG AGC AGG TCT TCT CTT GAA AGA CCT GCT CAG GGA CCT GGG G; kip2<sub>3.sense</sub>, GAT CCC CGG ACG AGG AGC CGG TGG AGT TCA AGA GAC TCC ACC GGC TCC TCG TCC TTT TTG GAA A; kip2<sub>3.antisense</sub>, AGC TTT TCC AAA AAG GAC GAG GAG CCG GTG GAG TCT CTT GAA CTC CAC CGG CTC CTC GTC CGG G. The p57kip2 expression vector was cloned by ligating an EcoRI-EcoRI fragment of the rat p57kip2 cDNA into the pIRES2-EGFP vector (BD Biosciences). Coexpression of citrine and hygromycin B resistance genes was achieved by the integration of a NheI-NotI citrine cDNA fragment into the multiple cloning site of the pcDNA3-hygB expression vector (Invitrogen Life Technologies).

**Cocultures of Dissociated Dorsal Root Ganglia (DRGs).** DRGs were collected and treated with trypsin and collagenase for 45 min in DMEM. The cells were dissociated mechanically, and trypsin reaction was stopped by addition of medium containing 10% FCS. After centrifugation, cells were resuspended in DRG medium [DMEM-Glutamax, penicillin/streptomycin (both Invitrogen Life Technologies), 10% FCS, and 100 ng/ml NGF (Sigma-Aldrich)] and plated on collagen (BD Biosciences)-coated dishes. After 2 days medium was replaced by myelination-promoting medium (DRG medium plus 50  $\mu$ g/ml ascorbic acid) and exchanged every 2 days. For transplantation experiments, transfected Schwann cells were selected with hygromycin B

containing medium for 48 h, then gently trypsinised and seeded on dissociated DRG cocultures at a density of 100,000 cells per square centimeter.

**Gene Expression Analysis.** Expression of rat p57kip2 was detected by means of TaqMan (Rn00711097\_m1; Applied Biosystems) as well as SybrGreen assays. Sequences of oligonucleotides were as follows: p57kip2<sub>fwd</sub>, CAG GAC GAG AAT CAG GAG CTG A; p57kip2<sub>rev</sub>, TTG GCG AAG AAG TCG TTC G; p27kip1<sub>fwd</sub>, TGG ACC AAA TGC CTG ACT CGT; p27kip1<sub>rev</sub>, GGC CCT TTT GTT TTG CGA A; P0<sub>fwd</sub>, CCC CAG TAG AAC CAG CCT CA; P0<sub>rev</sub>, TCC AGG CCC ATC ATG TTC TT; PMP22<sub>fwd</sub>, GCG GAA CAC TTG ACC CTG AA; PMP22<sub>rev</sub>, TCA TTT AAA CAT GTG GCC CCA; MBP<sub>fwd</sub>, CAA TGG ACC CGA CAG GAA AC; MBP<sub>rev</sub>, TGG CAT CTC CAG CGT GTT C; MAL<sub>fwd</sub>, AGG AGG CCT TTG GTT ATC CC; MAL<sub>rev</sub>, GCA AAT GGC AGA TTT GGG TAC; Oct-6<sub>fwd</sub>, GGC ACC CTC TAC GGT AAT GTG T; Oct-6<sub>rev</sub>, TTG AGC AGC GGT TTG AGC T; CXCR4<sub>fwd</sub>, CGT CGT GCA CAA GTG GAT CT; CXCR4<sub>rev</sub>, CAG TGG AAG AAG GCG AGG G; Krox24<sub>fwd</sub>, CCC TGT TGA GTC CTG CGA TC; Krox24<sub>rev</sub>, GGC GTG TAA GCT CAT CCG AG; Krox20<sub>fwd</sub>, TTT TTC CAT CTC CGT GCC A; Krox20<sub>rev</sub>, GAA CGG CTT TCG ATC AGG G; Itgb4<sub>fwd</sub>, CTC CAG CAG ACG AAG TTC CG; Itgb4<sub>rev</sub>, GTC TTG CTT TTT CCC AGC GT; Lgi4<sub>fwd</sub>, TGG CCA AGT CAC TGT AGC AGG; Lgi4<sub>rev</sub>, TTG AAG CAC GCT GCG AAT AA; Sox10<sub>fwd</sub>, GCA GGC TGG ACA CTA AAC CC; Sox10<sub>rev</sub>, GTG CGA GGC AAA GGT AGA CTG; Nab1<sub>fwd</sub>, GGC CAA AAT GAT TGG TCA CAT; Nab1<sub>rev</sub>, TTG TGT GGA TCC TCG TCG C; p75-LNGR<sub>fwd</sub>, TAT CTG GAA GCC ATG TCT GCC; p75-LNGR<sub>rev</sub>, ATA GAC CAA TGG ACC AGC CCT; GAPDH<sub>fwd</sub>, GAA CGG GAA GCT CAC TGG C; GAPDH<sub>rev</sub>, GCA TGT CAG ATC CAC AAC GG; ODC<sub>fwd</sub>, GGT TCC AGA GGC CAA ACA TC; ODC<sub>rev</sub>, GTT GCC ACA TTG ACC GTG AC.
